# Supplementary material for: Influence of Alternative Prey on the Functional Response of a Predator in Two Contexts: With and without Intraguild Predation
Source: MDPI journal article supplement (doi:10.3390/insects15050315), 2024-04-28
Supplement: s1 [file s1]

**Table S2.** Akaike Information Criterion (AIC) values for the Functional Response Models of both experiments, without and with IGP (parasitized whitefly nymphs). All models fitted were selected without prey replacement.

| Experiment     | Treatment | Fitted models               | FRAIR package responses | AIC      | Selected Model          | Functional Response Type |
|----------------|-----------|-----------------------------|-------------------------|----------|-------------------------|--------------------------|
| 1) Without IGP | No AP     | Fixed $q=0$                 | flexpnr                 | 735.3044 | Flexible or Generalized | Type Gen                 |
|                |           | Flexible $q$                | flexpnr                 | 594.2952 |                         |                          |
|                |           | Type III $q=1$              | hassIIInr               | 629.1702 |                         |                          |
|                | 5_AP      | Fixed $q=0$                 | flexpnr                 | 779.7787 | Flexible or Generalized | Type Gen                 |
|                |           | Flexible $q$                | flexpnr                 | 705.4561 |                         |                          |
|                |           | Type III $q=1$              | hassIIInr               | 776.7272 |                         |                          |
|                | 25_AP     | No evidence of any response |                         |          |                         |                          |
|                | 80_AP     | Fixed $q=0$                 | flexpnr                 | 505.7692 | Flexible or Generalized | Type Gen                 |
|                |           | Flexible $q$                | flexpnr                 | 497.2479 |                         |                          |
|                |           | Type III $q=1$              | hassIIInr               | 501.9535 |                         |                          |
| 2) With IGP    | No AP2    | Fixed $q=0$                 | flexpnr                 | 306.1488 | Roger's Type II         | Type II                  |
|                |           | Flexible $q$                | flexpnr                 | 307.7180 |                         |                          |
|                |           | Type II $q=0$               | rogersII                | 306.1488 |                         |                          |
|                | 5_AP2     | Fixed $q=0$                 | flexpnr                 | 312.1717 | Roger's Type II         | Type II                  |
|                |           | Flexible $q$                | flexpnr                 | 338.6527 |                         |                          |
|                |           | Type II $q=0$               | rogersII                | 312.1717 |                         |                          |
|                | 25_AP2    | Fixed $q=0$                 | flexpnr                 | 348.5093 | Flexible or Generalized | Type Gen                 |
|                |           | Flexible $q$                | flexpnr                 | 348.2278 |                         |                          |
|                |           | Type III $q=1$              | hassIIInr               | 349.4491 |                         |                          |
|                | 80_AP2    | Fixed $q=0$                 | flexpnr                 | 398.8570 | Roger's Type II         | Type II                  |
|                |           | Flexible $q$                | flexpnr                 | 400.3724 |                         |                          |
|                |           | Type II $q=0$               | rogersII                | 398.8570 |                         |                          |
