# Supplementary material for: Influence of Alternative Prey on the Functional Response of a Predator in Two Contexts: With and without Intraguild Predation
Source: MDPI journal article supplement (doi:10.3390/insects15050315), 2024-04-28
Supplement: s1 [file s1]

**Table S1.** Generalized Linear Model analyses of the number consumed whiteflies and aphids, comparing among whitefly densities offered, inside each treatment of alternative prey (aphids) for Experiment 1 (without intraguild predation) and 2 (with intraguild predation using parasitized whitefly nymphs).

| Consumed whiteflies among offered whitefly densities |           |                   |    |          |           |            |          |
|------------------------------------------------------|-----------|-------------------|----|----------|-----------|------------|----------|
| Experiment                                           | Treatment | GLM family        | Df | Deviance | Resid. Df | Resid. Dev | P        |
| Without IGP                                          | No AP     | Negative Binomial | 4  | 85.57    | 25        | 33.696     | < 0.0001 |
|                                                      | 5_AP      | Negative Binomial | 4  | 30.477   | 25        | 35.37      | < 0.0001 |
|                                                      | 25-AP     | Negative Binomial | 4  | 34.651   | 25        | 35.316     | < 0.0001 |
|                                                      | 80_AP     | Negative Binomial | 4  | 26.165   | 25        | 32.094     | < 0.0001 |
| With IGP                                             | No AP     | Negative Binomial | 4  | 108.12   | 25        | 28.359     | < 0.0001 |
|                                                      | 5_AP      | Negative Binomial | 4  | 69.216   | 25        | 28.752     | < 0.0001 |
|                                                      | 25-AP     | Negative Binomial | 4  | 79.94    | 25        | 31.722     | < 0.0001 |
|                                                      | 80_AP     | Negative Binomial | 4  | 25.259   | 25        | 30.588     | < 0.0001 |
| Consumed aphids among offered whitefly densities     |           |                   |    |          |           |            |          |
| Without IGP                                          | 5_AP      | Gaussian          | 4  | 0.33333  | 25        | 16.333     | 0.9725   |
|                                                      | 25-AP     | Poisson           | 4  | 1.8037   | 25        | 73.142     | 0.7718   |
|                                                      | 80_AP     | Gaussian          | 4  | 912.13   | 25        | 4610.2     | 0.2929   |
| With IGP                                             | 5_AP      | Gaussian          | 4  | 8.5333   | 25        | 35.333     | 0.1963   |
|                                                      | 25-AP     | Gaussian          | 4  | 371.33   | 25        | 416.67     | 0.0002   |
|                                                      | 80_AP     | Negative Binomial | 4  | 4.2927   | 25        | 30.497     | 0.3678   |
